# Supplementary material for: Electroencephalographic power spectrum patterns related to the intelligence of children with learning disorders
Source: PeerJ. 2025 Mar 26;13:e19138. doi: 10.7717/peerj.19138 (PMC11954465; doi:10.7717/peerj.19138)
Supplement: Supplemental Information 1 — Extraction method: Principal component analysis. Rotation method: Varimax with Kaiser normalization. For greater clarity, small coefficients with absolute values below 0.1 were supressed from the table. *Rotation sum of squared loadings. [file peerj-13-19138-s001.xlsx]

## Sheet: Sheet1
Supplementary Table: Rotated Component Matrix
	Components
	1	2	3	4	5	6	7	8	9	10	11	12	13	14	15	16	17	18	19	20	21	22	23
C3_DELTA	0.917898		0.130586		-0.131009					0.143002
F4_DELTA	0.911032				-0.106345							-0.167155		-0.128938
T3_DELTA	0.906838				-0.142594	0.100775											0.15485
C4_DELTA	0.905842		0.119565		-0.121295		0.104346										0.162646
T4_DELTA	0.892531		0.113408		-0.160167
P3_DELTA	0.879725		0.13286		-0.141751												0.101138
F3_DELTA	0.874947				-0.106525					0.236153
CZ_DELTA	0.873195		0.101678		-0.158676						-0.103141			-0.123917				0.132081		0.202452
F8_DELTA	0.871748		0.150256		-0.125025	0.159769											-0.100801
Fp2_DELTA	0.871604			-0.107764	-0.104479	0.100805									-0.123202		-0.131572
FZ_DELTA	0.86851									0.160092													0.255064
P4_DELTA	0.815138		0.192979		-0.108562	0.198602					-0.131228	0.26785			0.114827		0.126038			-0.109862
PZ_DELTA	0.81508		0.198371		-0.170958		-0.120101				-0.14528						0.1487	0.177291
T5_DELTA	0.803381		0.190116		-0.194026			-0.137064				0.203663									0.196115
T6_DELTA	0.774937		0.298273		-0.168456				-0.139694			0.223928	-0.102217	0.15708			-0.11333						-0.109884
Fp1_DELTA	0.764362				-0.126894		-0.145635								-0.148345	-0.123708				0.168959	0.208568		-0.115141
F7_DELTA	0.75789									0.294136		0.294633									-0.150102		0.257645
C4_THETA	0.727877		0.179005			0.47466				0.12192							0.148832			0.138546	-0.102043
T3_THETA	0.7085		0.119188		-0.115194	0.555475
O1_DELTA	0.704322		0.258323									0.552733											-0.125904
T4_THETA	0.69827		0.218645			0.529618								-0.112024				0.164597
F7_THETA	0.657506			-0.103469		0.330833				0.497191		0.239288									-0.114012		0.180919
O2_DELTA	0.649752		0.183614									0.62175								-0.120304
C3_THETA	0.647805		0.234998		-0.149772	0.450496				0.10048				-0.131859			0.238812			0.232816
P3_THETA	0.622654	-0.103358	0.28576			0.453106						0.225399			0.127932		0.198254	0.228513
P4_THETA	0.615721	-0.109858	0.27079			0.519041						0.217324					0.121238	0.288791
T5_THETA	0.603082		0.312828	-0.130457	-0.111174	0.542984						0.18263					0.165185
FZ_THETA	0.570362		0.109532			0.55981				0.20093							-0.126581			-0.124927			0.219229
T6_THETA	0.535373		0.346466		-0.110128	0.506978			-0.111653			0.246439		0.125068			0.110971	0.24244
P4_BETA2	-0.521007		-0.32335	0.195763	0.493116			0.27972	0.112231				-0.13025		0.246895						0.107028
Fp2_ALFA2		0.968024
F3_ALFA2		0.966964
Fp1_ALFA2		0.964428
F4_ALFA2		0.961334
F8_ALFA2		0.952451					0.11048
O1_ALFA2		0.869449						-0.137013			0.234507										-0.123585		-0.117118
T3_ALFA2		0.862713		0.115846	-0.112878				-0.101363				0.123207							0.198193			-0.106853
T4_ALFA2		0.861599					0.103994		-0.10243							0.145002
P4_ALFA2		0.854247		0.129715				0.243988			-0.10838
P3_ALFA2		0.846523						0.226403			-0.106242									-0.151837			0.108399
T5_ALFA2		0.843376														-0.111885				-0.101486	0.133552		0.156328
T6_ALFA2		0.830498												0.11179						0.102259	-0.109148
O2_ALFA2		0.826528						-0.193534			0.254381	0.134157									-0.147513
FZ_ALFA2		0.762694					-0.108391		0.404857														0.276038
PZ_ALFA2		0.750492			-0.125026		-0.110811				-0.21995	-0.114928	0.133875			-0.141142	0.103585
CZ_ALFA2	0.118763	0.730768									-0.146405	-0.189846	-0.103024				0.136375	0.110904		0.197888			0.301591
F7_ALFA2	0.225024	0.70469								0.543983							-0.102556						-0.153086
F3_ALFA1	0.156893		0.931875		-0.109832
F4_ALFA1	0.189611		0.924617			0.111656
Fp1_ALFA1	0.174685		0.91849		-0.105386	0.116057
F8_ALFA1	0.215993		0.917335			0.153999
Fp2_ALFA1	0.186402		0.913517			0.143312
O1_ALFA1			0.808034		-0.144004			-0.113036			0.184098			-0.118543				-0.102414					-0.10535
T3_ALFA1	0.242719		0.807017		-0.192494				-0.109259	0.15758							0.164221
T6_ALFA1			0.784894						-0.180378			0.107666		0.15074			-0.118236		-0.131679	0.10548		-0.160328
T4_ALFA1	0.259122		0.770145		-0.133028				-0.131215					-0.104291		0.116043	0.210018			-0.101274
FZ_ALFA1	0.155069		0.762742			0.104958			0.243119	0.233082							-0.113273						0.275927
P4_ALFA1	0.169872		0.741538		-0.110306			0.270056			-0.197843						0.27674	0.110021		-0.100233
T5_ALFA1	0.127666	0.155038	0.716629		-0.137777			-0.193694		-0.134274					0.129011		-0.111159		-0.102778	-0.257558	0.250345
P3_ALFA1	0.256909	0.161219	0.693348		-0.10016			0.158597			-0.112004				0.198903		0.243016	0.16269		-0.216394	0.174926
O2_ALFA1			0.683698		-0.19758			-0.181502	0.144216		0.221431	0.20527		-0.146833				-0.267471
CZ_ALFA1	0.232617		0.682999								-0.137358	-0.130365			0.107063		0.312598			0.281424			0.223648
C3_ALFA1	0.183837		0.660725		-0.115485			0.117977									0.544972
PZ_ALFA1	0.249376		0.593721						-0.138864	-0.131917	-0.226161	-0.162423			0.120999		0.397866	0.255031
F4_BETA1				0.875742	0.241155				0.119915			-0.104804									-0.177211
FZ_BETA1				0.866385	0.230823		-0.113459														-0.113957		0.136162
F3_BETA1				0.846609	0.225388													-0.147935			-0.104844
F8_BETA1				0.776529	0.280034		0.106503	-0.105397							-0.223457						-0.10832
P4_BETA1		0.159083		0.76746			0.102615	0.289981			0.112191				0.161527		0.18073	0.265739			0.115972
CZ_BETA1				0.765757	0.159954													0.370978		0.272187	0.116623
Fp1_BETA1		0.104995		0.738358	0.215539		0.152798				0.144758				-0.316817						0.261382
Fp2_BETA1			-0.120466	0.732068	0.189647		-0.122535	-0.117481							-0.468444
C3_BETA1		0.127567		0.720274	0.182872	-0.100002	-0.134426	0.419376	-0.120023		0.105983			-0.150968			0.154554
P3_BETA1		0.249205		0.710112			-0.130105	0.256427			0.18515			-0.12446	0.203156		0.185697	0.211202			0.150774	0.136073
C4_BETA1		0.130714		0.697482	0.184636		0.206153	0.361692			0.130219	0.156142		-0.106936		0.123542	0.19471				0.124795	0.105041	-0.14512
T6_BETA1	-0.215088	0.195942		0.648666					-0.177843		0.375803			0.303208								-0.135487
T5_BETA1	-0.132488	0.188375		0.566634	-0.154583			-0.132633		0.134924	0.456016		0.110663	0.193116		-0.124851	0.101674	-0.114395			0.325748		0.170397
F3_BETA2	-0.340722		-0.204714	0.242969	0.810245
F4_BETA2	-0.303405	-0.106458	-0.181859	0.282864	0.791661																-0.147963
F8_BETA2	-0.329356		-0.188993	0.153793	0.77205				-0.10478						-0.142256						-0.139639
FZ_BETA2	-0.362885	-0.131798	-0.214263	0.261147	0.769201
F7_BETA2	-0.337022		-0.214519	0.244147	0.768352					0.157072					-0.164161
Fp1_BETA2	-0.294113		-0.221427	0.17033	0.683367	-0.100565									-0.364299						0.224516
Fp2_BETA2	-0.30574	-0.101611	-0.226603	0.116715	0.648057	-0.117354	-0.108468								-0.479109
C3_BETA2	-0.408093		-0.268059	0.233385	0.639771	-0.109868		0.366042							0.159379						0.118383
C4_BETA2	-0.38015		-0.234982	0.186812	0.638877		0.236673	0.272496							0.139757						0.196976
CZ_BETA2	-0.415755		-0.341828	0.211408	0.544891	-0.124337	0.154595								0.186766		-0.130421			0.263059	0.228527
Fp2_THETA	0.567355		0.12595			0.755888
Fp1_THETA	0.544759		0.117172			0.746164
F4_THETA	0.597006					0.693639
F8_THETA	0.624649		0.192318			0.690366												0.113412
F3_THETA	0.593514		0.195898		-0.127563	0.657736
FZ_GAMMA		-0.144668	-0.244358				0.788339	-0.131618					-0.127935			0.100658			0.10718				0.176462
F7_GAMMA	-0.185485		-0.238406				0.706913			0.295297					-0.240281					-0.116697
C4_GAMMA	-0.206876	-0.163606	-0.221211			-0.121333	0.639605	0.313013		-0.120295							0.173052			0.202486		0.177099	-0.115396
P4_GAMMA				0.140091			0.638642	0.336319	0.114307		-0.184038	0.127719	-0.119875	0.177545	0.132627	-0.161343	0.258709	0.137517					-0.134542
Fp1_GAMMA	-0.222807	-0.127286	-0.205538		0.139992		0.570312								-0.470416				0.123661		0.299628		-0.130722
F8_GAMMA	-0.302408	-0.200567	-0.31801	-0.180538			0.56008			-0.10555		-0.214825			-0.289384	-0.104458			-0.126758		-0.102	0.138729
F4_GAMMA	-0.12182	-0.243814	-0.307381	-0.177102			0.533186			-0.138057	0.160567	-0.346177									-0.272819
F3_GAMMA	-0.198168	-0.231383	-0.231149	-0.172368		-0.12039	0.445832		-0.141922	0.204471		-0.278318	-0.121022	0.124171	0.120532		-0.17743	-0.119789		-0.1745	-0.143126	-0.132514	-0.122126
C3_ALFA2		0.476822	0.272933					0.665511
C4_ALFA2		0.564519	0.200773	0.110749				0.630701									0.135822			-0.105462
C3_GAMMA	-0.219835				-0.119592	-0.166896	0.519189	0.571699								-0.130135	-0.102447	-0.150251			-0.118182	0.170878
O2_GAMMA	-0.101232								0.861848							-0.128142							0.13388
O2_BETA2	-0.300301	0.204412	-0.233127		0.181868		-0.108769		0.720854		0.292721	-0.108124
O1_GAMMA	-0.144157			-0.120303	-0.161003		0.219645		0.673629														-0.411578
O1_BETA2	-0.382421	0.333579	-0.218526		0.220329				0.513096		0.330961	-0.111559											-0.241538
F7_ALFA1	0.19867		0.289469	-0.122922						0.836809
F7_BETA1	0.194106			0.456972	0.123381					0.796197
O2_BETA1	-0.1008	0.120886		0.366376			-0.155096		0.239854		0.769355							-0.100304
O1_BETA1	-0.148056	0.190523		0.400542							0.754235							0.100894					-0.115483
O2_THETA	0.488293	-0.117751	0.316654			0.246282				0.1139	0.112709	0.616256
O1_THETA	0.467349	-0.140616	0.412002	-0.123944		0.317832				0.105988	0.116044	0.510533					0.162233						-0.120634
T3_BETA1		0.169608		0.271168			-0.106356				0.103477		0.848253
T3_BETA2	-0.288791			-0.135264	0.202871		-0.128911						0.815162	0.12564		0.241315
T3_GAMMA	-0.332552	-0.105238	-0.151927	-0.259158							-0.119877		0.748449	0.117999		0.194412
T6_GAMMA	-0.304732			-0.159409			0.247943			-0.121332				0.737043		0.134945					-0.225524
T5_GAMMA	-0.261775		-0.155189	-0.158899		-0.105803	0.244718	-0.113661	0.135478				0.126005	0.661314		0.126998		-0.155116			0.149573
T6_BETA2	-0.49536		-0.2713		0.356277	-0.113245	-0.131452				0.120125			0.578495		0.189349
T5_BETA2	-0.36945		-0.184128		0.316176		0.162473		0.100425	0.182903			0.157775	0.551445		0.195837			0.125415		0.337311
Fp2_GAMMA	-0.266509	-0.130603	-0.274248	-0.136984		-0.109063	0.215105								-0.719848
T4_BETA2	-0.302467	-0.147045	-0.117129		0.161117		-0.145309		-0.102915				0.295634	0.159307		0.767117
T4_GAMMA	-0.333999	-0.182642	-0.152069	-0.159957					-0.107988		-0.107872		0.165875	0.218609		0.716761					-0.15344
T4_BETA1				0.487922		-0.108379	0.120829		-0.102769				0.199624			0.682299					0.157903		-0.163209
C4_ALFA1	0.236047		0.562838					0.162215				0.129038		-0.11271			0.613772
PZ_BETA1				0.467954	-0.118238													0.742518	0.256584
PZ_THETA	0.415093		0.189699	0.121561		0.402967			-0.101651									0.640212
PZ_GAMMA		-0.10133																	0.945754
PZ_BETA2	-0.253641		-0.109458		0.203119														0.889089
CZ_GAMMA				0.10313		-0.119731	0.599483										-0.117189			0.64738	0.107083
CZ_THETA	0.386088	0.102296	0.145132	0.151559	-0.160357	0.393285					-0.152902	-0.113449								0.580429	-0.138489
P3_GAMMA					-0.103209		0.143117															0.896446
P3_BETA2	-0.404245		-0.307564	0.202348	0.374805	-0.118443	0.134673	0.225335							0.188019				0.107463		0.173306	0.560998
Eigenvalue*	24.2366	14.2811	14.2418	9.63357	7.29738	6.08486	4.78305	2.9137	2.88542	2.74792	2.71543	2.68398	2.52484	2.41289	2.33781	2.19766	2.12126	2.0998	2.06473	1.78947	1.5379	1.50496	1.3229
Variation explained, %*	18.223	10.7377	10.7081	7.24328	5.48675	4.57508	3.59628	2.19075	2.16949	2.0661	2.04168	2.01803	1.89838	1.8142	1.75775	1.65238	1.59493	1.57879	1.55243	1.34547	1.15632	1.13155	0.99466
Cumulative variances, %*	18.223	28.9607	39.6688	46.9121	52.3988	56.9739	60.5702	62.7609	64.9304	66.9965	69.0382	71.0562	72.9546	74.7688	76.5266	78.1789	79.7739	81.3527	82.9051	84.2506	85.4069	86.5384	87.5331
Note 1. Extraction method: Principal component analysis. Rotation method: Varimax with Kaiser normalization.
Note 2. For greater clarity, small coefficients with absolute values below 0.1 were supressed from the table.
*Rotation sum of squared loadings.
