# Supplementary material for: Electroencephalographic power spectrum patterns related to the intelligence of children with learning disorders
Source: PeerJ. 2025 Mar 26;13:e19138. doi: 10.7717/peerj.19138 (PMC11954465; doi:10.7717/peerj.19138)
Supplement: Supplemental Information 2 — Data of Mexican children (8–11 years old) with and without a Learning Disorder (LD): a Control group (n = 45) and an LD group (n = 91). Each column contains the following values: - Sex - Intelligence Quotient: obtained via the Wechsler Intelligence Scale for Children 4th Edition. - Percentile scores of a standardized academic evaluation that examines performance in reading, writing, and mathematics: Neuropsychological Scale for Children. - Seven broad bands of a 19-channel resting state EEG: delta (0.7–3.6 Hz), theta (3.9–7.5 Hz), alpha-1 (7.8–9.8 Hz), alpha-2 (10.1–12.6 Hz), beta-1 (12.8–20.4 Hz), beta-2 (20.7–30.47 Hz), and gamma (30.85–50 Hz). [file peerj-13-19138-s002.xlsx]

## Sheet: DATA
SUBJECT CODE (Control; Learning Disorder)	AGE (Years)	SEX (Male= 1; Female= 2)	GROUPS (CTRL= 0; LD= 1)	WISC: FULLSCALE IQ	READING: PRECISION	READING: COMPREHENSION	READING: SPEED	WRITING: PRECISION	WRITING: COMPOSITION	WRITING: SPEED	MATH: COUNTING	MATH: NUMBER MANAGEMENT	MATH: CALCULUS	MATH: REASONING	READING SUM	WRITING SUM	MATH SUM	ACADEMIC TOTAL SUM	Fp1_DELTA	Fp1_THETA	Fp1_ALPHA1	Fp1_ALPHA2	Fp1_BETA1	Fp1_BETA2	Fp1_GAMMA	Fp2_DELTA	Fp2_THETA	Fp2_ALPHA1	Fp2_ALPHA2	Fp2_BETA1	Fp2_BETA2	Fp2_GAMMA	F3_DELTA	F3_THETA	F3_ALPHA1	F3_ALPHA2	F3_BETA1	F3_BETA2	F3_GAMMA	F4_DELTA	F4_THETA	F4_ALPHA1	F4_ALPHA2	F4_BETA1	F4_BETA2	F4_GAMMA	C3_DELTA	C3_THETA	C3_ALPHA1
CTRL1	10	1	0	113	75	98	95	84	50	84	63	91	91	91	268	218	336	822	507.054	310.32	185.745	80.4994	79.6342	31.1408	9.057	651.518	310.068	190.358	76.7052	80.2327	32.2211	8.6288	467.846	264.534	201.492	79.7602	86.2806	23.1302	3.5271	378.184	215.58	179.213	70.4297	74.9923	20.9392	2.5053	351.841	228.792	331.538
CTRL2	9	1	0	93	63	37	37	50	63	84	84	98	95	50	137	197	327	661	724.519	274.668	219.135	52.9301	78.5786	79.3565	6.7093	708.71	292.491	237.518	48.5934	74.938	81.045	5.8126	345.653	234.064	195.358	64.8782	71.5542	86.1812	2.1433	435.36	283.212	237.726	84.2215	83.6189	96.0519	2.7332	341.126	246.401	342.405
CTRL3	10	1	0	111	37	95	63	75	26	37	84	84	91	91	195	138	350	683	792.197	214.636	229.615	317.74	62.1372	20.2494	3.5595	701.745	202.842	239.266	314.749	59.0457	17.2187	3.3633	788.913	257.768	227.957	282.116	78.1527	20.3596	3.0178	720.787	256.917	268.386	315.931	89.5598	22.4462	3.008	427.607	251.774	223.787
CTRL4	10	1	0	93	50	63	75	75	75	63	63	26	75	63	188	213	227	628	707.297	478.835	249.415	55.7718	73.7504	24.9152	4.2605	901.362	504.404	269.263	51.8925	66.6735	23.5071	4.7441	646.947	410.427	250.299	76.0313	78.9352	25.381	4.4455	650.474	411.601	245.618	63.7168	67.1843	24.3138	3.5868	458.732	252.928	197.093
CTRL5	10	1	0	94	63	37	84	63	37	84	5	63	75	26	184	184	169	537	793.391	206.355	212.569	70.0851	60.2044	18.8611	5.3771	591.595	191.001	214.562	70.5732	55.7834	14.9213	3.36	391.603	182.666	221.33	76.0737	69.6577	19.4073	2.8512	802.256	219.442	195.137	74.8929	68.5623	16.44	4.5465	412.062	258.514	342.255
CTRL6	9	2	0	99	63	75	63	84	63	63	50	26	50	26	201	210	152	563	676.138	258.623	250.939	76.4968	76.3829	25.7683	6.7915	429.268	242.221	254.308	67.9399	67.9497	24.1094	4.6775	453.945	304.225	319.487	69.5288	83.6592	22.3897	2.5471	446.569	250.287	321.88	68.3047	70.5187	17.1897	2.3094	251.404	252.051	434.274
CTRL7	9	1	0	94	50	84	91	84	75	84	63	63	75	26	225	243	227	695	536.479	281.227	153.084	107.112	81.0825	60.1564	11.5093	539.456	303.258	159.38	116.751	106.545	118.942	20.0026	482.338	245.213	150.372	104.808	51.2101	34.3952	5.0843	389.822	323.973	140.787	95.1783	60.8945	39.7326	6.7703	377.18	255.635	120.012
CTRL8	9	2	0	106	75	50	63	37	63	37	84	63	37	75	188	137	259	584	1767.84	684.017	549.836	117.61	112.16	25.364	3.3914	1611.3	657.856	570.323	109.767	84.5426	15.5699	3.6833	1304.03	675.857	556.016	116.591	136.914	35.559	3.8466	1609.36	756.818	545.561	114.986	98.129	13.4396	2.4242	881.022	405.631	405.65
CTRL9	9	1	0	114	50	50	91	95	37	50	63	37	50	63	191	182	213	586	2749.69	556.341	488.937	96.84	48.4535	10.828	6.727	3082.02	671.286	460.77	102.811	62.8472	16.6531	12.0993	908.787	484.365	533.597	80.684	29.8941	3.7161	0.8018	929.533	617.042	528.341	102.052	44.4331	8.158	4.3808	773.194	368.533	338.888
CTRL10	9	1	0	82	84	84	95	84	91	50	84	50	91	50	263	225	275	763	1604.06	498.08	433.503	55.3638	48.314	9.1264	4.1078	1659.71	526.784	462.543	46.1611	48.707	8.1481	3.9417	1508.49	487.318	403.601	73.8567	66.5603	8.3292	2.0927	1376.22	586.695	500.672	79.5762	72.7758	8.965	3.1542	1340.69	743.387	751.545
CTRL11	10	1	0	92	63	95	16	98	98	16	63	37	84	75	174	212	259	645	1992.52	736.306	296.209	134.492	74.806	15.3647	6.059	1839.3	607.955	295.248	124.893	76.8659	17.4177	5.8686	1478.36	702.304	241.533	97.442	78.4279	15.3513	6.4823	1664.82	595	210.126	103.489	86.1567	14.5648	3.4964	844.563	575.923	203.091
CTRL12	11	2	0	108	75	84	26	26	84	16	63	26	26	91	185	126	206	517	1628.55	1228.58	684.465	115.702	48.4785	11.9065	3.5577	1614.15	1218.79	684.212	118.688	54.1174	14.3343	4.0705	945.882	777.021	598.509	113.841	42.5535	9.929	2.4986	940.978	768.488	608.601	101.813	41.4897	11.0475	3.6522	679.724	753.717	433.972
CTRL13	10	2	0	104	50	84	75	84	26	50	63	37	37	50	209	160	187	556	613.342	322.016	405.014	224.654	91.3213	34.8019	18.0259	698.935	334.581	383.886	220.183	97.3004	54.9774	29.3445	264.615	182.466	291.933	163.528	46.8497	13.6908	3.2487	230.386	175.621	273.188	155.151	42.0366	12.0502	3.0021	222.445	168.132	249.599
CTRL14	10	2	0	95	75	91	50	37	98	84	37	63	75	50	216	219	225	660	639.284	325.738	606.186	266.999	68.302	29.6651	11.27	587.735	317.935	614.34	243.075	69.4973	29.9976	9.893	278.802	234.577	432.816	164.75	59.2733	21.7331	3.5127	232.85	212.806	443.769	148.694	52.4484	16.1506	3.1277	186.271	195.018	495.664
CTRL15	9	2	0	113	84	75	75	75	91	37	84	50	75	50	234	203	259	696	353.993	426.708	87.5182	52.351	56.775	28.044	13.5772	373.45	460.964	102.339	61.4529	58.1603	38.1582	16.2045	317.003	427.051	72.7239	40.9975	40.4136	14.7188	4.5745	380.267	432.367	96.5096	48.683	42.7371	19.1524	6.7608	168.689	407.928	56.7419
CTRL16	10	2	0	105	75	50	95	95	84	75	63	26	37	26	220	254	152	626	508.206	298.153	195.105	62.6005	69.7653	22.6639	9.2865	523.227	292.308	193.476	53.5973	67.3212	21.5584	9.3118	258.709	207.059	158.179	60.7882	57.1482	16.7771	3.7432	293.363	205.305	155.022	50.4838	59.0635	18.4093	4.5554	170.985	167.275	182.143
CTRL17	10	2	0	92	50	26	84	63	75	63	63	37	37	50	160	201	187	548	963.102	273.459	119.374	33.3234	56.0736	34.1899	10.865	891.196	245.433	140.052	36.4052	60.0751	32.9142	12.055	499.938	252.959	101.171	33.6101	54.867	30.819	7.9634	457.073	209.021	105.193	23.884	49.0398	24.6739	6.2245	325.949	200.192	106.854
CTRL18	8	1	0	124	75	98	91	75	75	50	63	98	95	98	264	200	354	818	773.523	476.809	337.908	64.5183	62.7937	24.0134	3.9855	926.681	499.81	311.808	62.9479	65.9447	32.404	4.3975	604.73	556.947	298.73	54.3185	59.3392	29.9358	3.2942	976.17	548.82	245.133	69.6302	74.3838	46.0897	3.9275	431.989	520.328	203.874
CTRL19	11	1	0	98	76	84	37	75	63	26	26	63	50	91	197	164	230	591	249.476	84.1388	140.945	265.478	62.164	20.1131	4.1586	244.112	86.8244	129.124	247.638	70.7468	21.8412	4.7698	205.438	87.618	176.487	278.98	86.8292	27.9703	3.5688	170.3	82.8119	147.531	232.312	94.2154	28.5693	3.9689	108.698	84.3481	161.291
CTRL20	8	2	0	119	50	37	91	98	84	95	63	75	95	63	178	277	296	751	343.399	132.209	161.889	35.7946	79.2292	36.381	14.0938	349.252	137.778	144.885	36.0509	91.0138	39.647	7.022	342.941	128.601	166.01	32.4122	89.6014	43.1269	5.3062	265.225	117.48	146.947	39.2259	90.6427	43.9337	3.6329	282.752	245.722	295.047
CTRL21	10	2	0	120	84	75	99	99	84	95	63	63	37	63	258	278	226	762	335.127	123.575	157.502	88.8352	57.2704	38.4958	8.279	410.1	145.168	163.058	88.7584	85.1224	54.0428	22.3508	194.105	101.882	135.699	95.7405	60.7065	34.221	5.1151	267.44	115.897	125.72	77.4696	70.6109	30.9443	4.1775	149.447	88.4944	101.958
CTRL22	9	2	0	125	75	91	95	95	91	84	84	63	95	63	261	270	305	836	267.848	131.371	77.7599	54.5285	41.791	28.7898	5.583	297.513	137.169	83.0443	57.0006	45.4891	49.4658	7.1155	238.969	181.849	72.5646	56.2116	50.7654	37.6096	6.2608	309.21	183.467	78.5271	65.1002	45.268	35.403	4.9724	201.955	151.373	174.505
CTRL23	10	1	0	97	84	95	75	37	99	26	63	63	63	91	254	162	280	696	465.589	241.447	99.7823	32.1409	40.7551	16.3467	6.0779	1422.76	293.935	108.522	38.0538	48.2285	21.9067	9.1564	447.354	256.284	90.7511	35.1058	43.1612	15.9593	5.0911	493.421	293.304	124.336	36.8064	66.1153	35.2631	14.7017	242.537	205.161	98.1926
CTRL24	10	1	0	86	63	75	63	75	98	16	37	37	91	91	201	189	256	646	291.418	148.497	159.623	81.7397	48.2768	16.7662	4.9829	351.784	150.04	142.7	82.9314	56.7973	20.6284	7.2959	376.835	186.02	170.211	79.7688	90.814	20.6567	5.7357	397.555	197.384	154.438	85.359	119.738	23.0372	7.2483	222.26	164.126	142.569
CTRL25	10	2	0	89	50	50	91	75	75	37	63	63	75	91	191	187	292	670	486.372	164.242	106.276	59.7341	50.091	41.0598	21.571	548.475	172.464	103.281	71.1798	47.5318	28.2331	13.2407	351.396	167.597	120.166	62.2257	47.3474	17.0008	5.3915	391.907	130.413	104.448	72.3188	43.1457	23.0851	7.3267	244.11	153.476	85.5588
CTRL26	9	2	0	108	50	37	63	95	91	16	50	63	91	91	150	202	295	647	346.657	112.367	337.524	92.1913	84.2082	51.9172	24.2553	362.388	115.056	306.32	91.8476	59.9798	34.8577	11.3267	233.54	112.053	264.695	85.2329	61.8012	26.7735	6.213	380.531	124.426	225.966	120.801	68.331	27.85	4.9659	243.685	159.541	647.251
CTRL27	9	2	0	119	75	63	95	91	95	50	84	63	50	91	233	236	288	757	472.926	235.574	290.452	136.566	46.4778	16.9646	5.8923	422.595	215.153	292.057	144.337	45.8808	16.0977	5.1443	397.702	240.337	298.918	142.417	62.2625	19.2795	4.474	354.4	226.405	279.735	159.231	59.235	17.0167	3.7268	282.446	261.499	485.53
CTRL28	9	1	0	104	75	50	26	91	84	9	84	37	63	75	151	184	259	594	611.995	526.145	255.152	46.4438	39.3532	28.4427	4.97	544.413	566.919	249.584	46.2904	43.193	29.6006	4.7009	379.284	408.339	262.579	44.3157	44.7885	25.4034	2.9272	367.55	478.027	229.071	43.1098	54.936	29.9271	3.0012	313.105	332.003	208.472
CTRL29	9	1	0	102	37	37	98	91	98	75	63	95	96	91	172	264	345	781	539.177	277.163	360.961	50.1848	39.5693	23.4825	5.3068	575.46	328.212	343.452	54.259	47.3019	23.5202	8.3531	458.814	227.584	348.757	44.2209	34.7587	16.0926	3.5274	415.039	246.853	340.993	49.4629	49.5151	19.7979	4.2889	277.785	217.445	226.947
CTRL30	9	2	0	97	50	37	63	84	50	5	50	37	75	63	150	139	225	514	405.68	192.561	159.419	92.9593	46.1947	23.7982	5.4044	444.483	208.087	175.359	81.531	46.8367	28.1636	9.5028	376.39	192.939	172.478	114.388	60.3926	33.9948	7.9651	309.471	205.658	194.613	96.6957	48.3586	25.13	5.3242	265.6	200.182	195.288
CTRL31	8	2	0	83	63	75	50	63	63	96	63	37	37	26	188	222	163	573	392.221	268.216	519.712	55.6259	68.657	22.6999	5.7054	417.285	255.687	545.151	55.0362	64.578	23.3961	6.0145	265.347	277.262	816.546	62.6125	121.292	30.4478	3.8779	296.202	246.335	794.156	65.3558	99.7905	39.0707	3.7461	270.972	265.664	1151.19
CTRL32	9	2	0	105	84	37	98	95	50	84	63	91	84	63	219	229	301	749	380.846	161.257	246.116	55.9308	75.8033	38.3762	5.0562	457.298	167.753	257.887	59.0501	83.7712	52.1824	5.2345	290.807	169.559	279.924	71.0925	114.132	54.0277	3.0085	240.149	165.217	328.927	72.7847	123.077	66.1712	3.2813	191.226	174.349	228.649
CTRL33	8	2	0	106	75	50	75	75	98	75	84	37	84	91	200	248	296	744	472.672	216.159	166.088	32.6433	41.1917	40.6616	22.8429	470.511	226.675	170.763	30.3982	40.1057	25.7568	12.8468	424.894	217.654	238.212	40.8476	46.7847	19.9089	6.7013	381.15	231.886	205.197	39.9638	46.8511	21.4274	6.5263	224.497	193.603	190.523
CTRL34	8	2	0	101	50	50	91	50	50	75	84	37	63	63	191	175	247	613	458.934	333.925	492.151	42.1243	60.6886	31.8943	22.9782	551.296	390.001	515.064	50.5343	66.6844	36.0521	22.3714	391.082	296.916	432.034	41.9274	54.1295	16.3554	4.6559	322.561	290.227	430.601	44.7617	54.8705	19.6994	4.3745	199.261	176.445	207.069
CTRL35	11	1	0	113	75	37	63	75	75	84	84	63	91	91	175	234	329	738	464.25	179.704	314.672	304.292	58.3682	31.0159	15.6788	435.479	196.248	333.914	317.544	62.828	37.843	16.0634	321.714	165.447	260.704	230.508	52.267	20.4762	4.356	346.009	161.538	304.339	268.039	52.2487	21.6675	4.7456	242.54	161.389	161.193
CTRL36	11	2	0	124	50	91	99	99	37	84	63	50	37	63	240	220	213	673	766.123	333.708	124.294	51.3882	55.3837	28.0265	20.177	906.188	341.896	129.604	53.7286	60.1056	29.8845	19.7208	471.377	228.055	124.34	44.5786	45.6623	19.3069	5.2197	589.601	222.405	119.654	43.5599	54.3366	19.6616	6.0651	305.262	212.013	111.355
CTRL37	10	2	0	127	75	63	0.1	75	95	37	84	63	84	91	138.1	207	322	667.1	1529.35	196.679	82.9287	43.1798	65.5777	27.4636	16.5793	869.736	205.779	76.3335	52.706	64.446	28.5296	14.7389	536.91	175.671	71.7914	38.1119	52.8063	19.3101	5.708	528.706	169.128	78.6432	51.1743	61.117	24.1941	7.7103	430.218	163.595	68.1461
CTRL38	10	1	0	115	75	84	99	91	99	84	84	50	84	91	258	274	309	841	614.372	218.76	66.1498	96.6296	38.5795	25.71	10.6138	756.466	233.654	72.9213	108.535	46.4452	33.1569	14.3088	426.404	214.334	63.0826	86.1453	31.0215	17.5046	4.9764	469.677	250.06	80.7856	110.132	41.9074	25.8435	7.8068	232.133	150.189	47.664
CTRL39	9	2	0	95	63	75	26	50	95	37	84	37	37	63	164	182	221	567	621.193	254.489	198.695	33.3573	54.5584	28.8193	7.5055	558.173	239.745	178.268	34.9208	54.0394	26.1607	6.4746	617.7	225.68	201.14	33.5972	56.2662	35.5198	6.4982	559.372	219.472	165.505	34.6236	53.8747	27.8066	5.1815	305.846	198.49	203.778
CTRL40	10	1	0	114	50	98	75	84	63	63	84	75	75	99	223	210	333	766	419.741	247.133	458.382	36.4918	45.0346	29.9038	4.3752	494.081	282.108	487.815	50.3452	67.8575	59.0679	6.9738	421.979	245.312	453.132	35.8504	45.4682	31.37	4.2323	411.852	278.863	418.307	48.0213	69.2436	46.8874	3.7879	228.439	264.783	360.516
CTRL41	11	2	0	105	37	63	75	50	75	84	63	99	84	50	175	209	296	680	670.027	200.198	132.001	179.125	192.477	84.989	47.7574	557.805	85.0427	139.075	106.316	104.795	35.9278	14.0205	237.969	123.923	95.4016	90.7126	113.974	68.5121	6.6259	858.51	197.899	112.097	87.0442	154.485	58.3696	10.7079	321.042	139.738	74.0523
CTRL42	8	1	0	138	75	91	99	99	99	98	85	95	96	99	265	296	375	936	299.502	116.685	53.086	45.1559	31.954	17.8934	9.7455	620.4	186.665	101.921	57.1464	56.9007	37.9226	25.2615	391.914	125.315	56.9894	50.7576	38.2227	20.4652	7.0446	316.047	119.139	49.8119	42.9283	38.075	17.0953	4.1157	233.876	119.607	73.9405
CTRL43	10	1	0	115	63	37	75	91	91	63	84	63	75	75	175	245	297	717	329.227	252.909	266.399	67.7237	43.6185	28.9582	2.9328	393.913	293.555	281.962	71.6171	54.7273	51.2535	4.8784	293.764	233.276	207.481	58.1655	59.2439	59.023	4.0407	266.65	246.219	185.436	54.9937	63.6923	52.537	5.4353	197.662	166.034	74.2742
CTRL44	11	2	0	120	84	50	95	99	95	63	84	75	91	91	229	257	341	827	2195	694.753	383.424	569.203	88.2598	11.8945	4.5448	753.133	443.812	368.532	536.458	72.4906	6.7765	1.7324	739.58	481.267	330.392	518.55	79.5521	8.8619	1.9753	603.671	409.86	375.715	533.22	75.4519	6.3467	1.3289	546.954	411.494	199.649
CTRL45	10	2	0	101	63	84	63	75	63	37	84	16	63	91	210	175	254	639	446.219	315.312	167.315	198.337	72.6123	27.6243	4.3648	542.414	352.47	176.489	203.023	73.5357	33.1424	4.9651	334.185	239.091	140.683	164.498	67.1171	24.8561	3.6313	382.207	494.725	181.98	221.926	185.447	44.3605	3.5735	225.503	384.344	141.773
LD1	9	2	1	71	0.1	0.1	1	5	2	26	63	0.4	9	26	1.2	33	98.4	132.6	865.567	261.223	314.298	84.6943	115.133	52.6158	11.0586	934.116	258.296	301.683	82.583	120.932	40.9423	7.6194	447.353	207.357	258.52	67.7882	87.245	20.4885	2.7689	517.497	219.424	231.058	68.8234	111.348	18.1272	3.1316	305.133	199.743	184.876
LD2	10	2	1	82	0.1	9	9	37	1	63	2	0.4	0.4	26	18.1	101	28.8	147.9	1644.08	2191.47	119.055	59.5915	69.0024	29.705	6.8796	2068.09	1976.68	128.792	72.9303	64.5695	27.7454	5.2732	530.363	793.141	106.943	59.7667	65.3439	27.1498	3.4479	904.853	1130.24	148.28	70.3979	74.3398	31.0751	3.7566	479.28	529.42	145.207
LD3	10	1	1	95	16	75	85	63	16	37	63	1	50	75	176	116	189	481	889.56	288.627	116.9	194.344	56.9276	43.7703	4.205	801.032	268.101	104.996	203.215	57.7647	41.0208	3.7329	709.243	275.333	102.341	204.96	65.6776	53.7865	3.2707	558.388	280.012	112.03	230.632	57.085	39.9737	2.69	474.401	278.599	165.738
LD4	9	1	1	98	0.1	63	16	16	37	37	84	5	16	16	79.1	90	121	290.1	505.094	210.816	275.05	58.1642	58.3177	19.6482	3.8197	531.564	231.393	267.262	57.9277	60.1203	25.5623	4.834	562.099	407.918	277.344	75.7137	89.1135	27.0066	4.6243	536.923	297.495	241.358	66.4853	83.3536	25.1531	4.7597	490.433	275.779	225.543
LD5	9	1	1	84	16	37	95	75	0.1	50	50	5	37	75	148	125.1	167	440.1	1004.4	394.444	342.404	261.857	38.8397	17.1595	6.3227	1101.55	362.244	350.163	250.092	44.7788	18.3196	6.2158	612.114	330.897	322.179	197.732	31.6072	14.3648	3.135	951.407	383.878	358.409	197.564	37.3878	14.0887	3.3602	419.077	243.177	195.04
LD6	10	1	1	100	63	63	75	37	5	50	1	50	0.4	50	201	92	101.4	394.4	1156.39	243.582	210.09	57.7534	54.8445	23.6447	5.0124	913.59	245.773	215.881	56.4561	63.8039	30.8161	6.6818	415.339	218.74	206.114	54.5502	45.6265	23.2513	3.763	400.271	219.943	209.014	63.3185	56.4711	26.8615	4.5993	346.746	224.205	277.715
LD7	10	1	1	80	16	2	50	9	2	16	16	2	5	16	68	27	39	134	1150.33	707.113	414.534	67.5537	62.5873	29.2373	4.7997	884.179	680.624	472.701	67.6336	76.6227	37.7509	5.6881	694.611	560.988	305.41	55.6507	55.7558	24.5572	3.0023	565.777	584.809	337.82	57.2759	59.8904	23.5876	2.7401	297.05	318.859	240.507
LD8	9	1	1	95	0.1	37	50	9	37	75	16	2	75	91	87.1	121	184	392.1	721.808	482.939	318.367	177.983	47.904	16.1699	3.3874	920.649	397.049	290.84	172.78	48.496	17.4807	3.5788	747.684	443.582	296.161	175.173	49.6	18.3978	2.21	618.168	311.385	284.849	177.112	48.3756	17.2013	1.9285	643.697	413.638	264.032
LD9	8	2	1	73	5	37	9	16	0.1	0.1	63	0.1	0.4	16	51	16.2	79.5	146.7	986.195	485.056	296.081	82.2264	67.9706	34.7472	9.1491	982.713	458.09	307.509	77.7735	53.7257	21.954	6.4425	938.82	399.585	235.606	83.0053	43.32	12.8231	4.0626	1546.88	368.076	287.748	82.3843	52.0328	21.8904	8.4731	424.13	255.703	146.317
LD10	10	2	1	86	16	2	37	1	1	9	50	0.1	0.1	16	55	11	66.2	132.2	1746.48	428.752	238.46	88.8861	83.3198	40.5376	8.3732	1672.55	395.015	230.645	77.0213	66.5112	28.77	6.9764	1010.18	321.016	171.593	62.5652	61.1729	24.8099	4.3237	1795.25	387.115	238.138	86.4021	75.8538	27.4251	6.578	740.516	282.498	195.52
LD11	9	2	1	72	0.1	50	16	16	16	50	63	16	16	26	66.1	82	121	269.1	1705.62	872.896	492.554	92.8345	49.0405	17.3446	7.0999	682.815	635.252	469.847	91.8518	45.0987	16.4258	3.7988	630.353	451.914	386.283	92.2138	42.7494	13.5575	2.6357	700.159	436.799	355.61	86.3925	45.5514	15.2809	3.0229	463.903	275.425	255.636
LD12	10	1	1	98	16	16	26	16	16	5	63	16	5	63	58	37	147	242	1863.94	695.81	487.328	66.2876	65.4155	24.8427	7.7431	398.939	695.518	443.546	40.2897	33.3456	8.4888	2.0125	728.918	391.274	437.484	50.3022	52.4696	18.0055	3.2602	635.94	450.231	464.306	46.127	46.4429	18.4827	3.09	415.378	326.836	400.909
LD13	8	2	1	86	0.1	2	9	5	9	50	84	37	16	2	11.1	64	139	214.1	1082.95	390.741	252.664	218.428	49.5355	28.7034	5.0154	1352.81	395.882	259.211	240.585	54.0197	38.3545	7.4245	605.679	407.647	248.81	226.624	51.6828	26.1848	4.2427	391.034	373.171	244.679	248.272	43.0708	31.6006	4.6348	427.127	310.915	194.129
LD14	10	1	1	94	1	9	37	16	1	75	63	16	5	25	47	92	109	248	630.857	362.775	184.671	403.882	68.4804	31.6107	5.9027	801.772	405.605	208.81	402.038	61.658	29.1385	5.0691	629.175	248.117	142.1	290.562	67.8341	31.0383	2.8552	624.054	301.48	168.216	305.426	67.7778	28.9212	2.9301	362.365	234.258	152.438
LD15	9	1	1	71	1	1	16	50	0	5	16	0.4	16	2	18	55	34.4	107.4	3738.06	2455.1	225.45	64.7995	78.5178	16.3957	5.462	3406.05	3223.79	237.775	71.1236	68.8445	13.9396	4.5584	2094.73	1512.37	233.88	79.4442	66.3693	19.1849	3.3553	1816.95	3779.17	251.446	78.5793	84.1822	9.7567	2.9727	1168.17	1061.26	321.748
LD16	9	2	1	96	37	84	63	63	5	2	63	16	16	37	184	70	132	386	1320	614.21	281.017	80.4791	98.8463	46.4588	7.3962	706.242	576.467	271.681	75.4193	82.2091	31.1327	5.2646	464.07	524.003	215.797	82.1105	128.424	30.8108	2.648	560.728	497.008	209.056	73.3728	101.115	24.5836	2.5119	336.841	565.894	217.642
LD17	8	2	1	71	0.1	0.1	0.1	0.1	0.1	0.1	0.1	0.1	0.1	0.1	0.3	0.3	0.4	1	1220.53	432.106	247.567	57.4356	58.5603	34.8748	5.084	1371.7	428.11	233.116	58.5469	60.5211	36.5413	5.7617	782.517	433.464	269.501	53.2934	55.3049	43.8361	3.6087	640.414	396.341	221.005	64.8754	57.1535	49.956	4.7355	432.771	347.156	457.473
LD18	9	1	1	92	0.1	50	16	16	5	5	5	16	9	50	66.1	26	80	172.1	728.533	384.5	376.63	68.7418	46.8193	17.7664	2.818	765.214	390.85	368.064	61.6224	47.7919	21.0226	3.6934	648.51	382.372	388.342	85.8811	65.6775	23.7348	3.2924	684.393	408.37	401.934	66.8112	63.6822	25.3028	3.0424	630.808	436.061	452.53
LD19	11	1	1	86	2	63	37	26	5	5	84	0.1	2	2	102	36	88.1	226.1	1134.86	441.461	453.633	131.753	45.668	17.2909	4.4629	1283.74	409.887	455.979	139.248	64.9808	25.9189	11.3289	935.403	329.662	362.259	125.929	58.3524	20.9223	6.3083	624.104	278.558	382.531	87.4623	51.1205	16.9677	2.5992	492.85	207.18	304.302
LD20	10	1	1	99	63	63	63	63	16	5	16	37	0.1	91	189	84	144.1	417.1	7252.21	805.953	248.966	128.541	85.2712	28.1593	15.5766	3254.62	809.602	216.42	127.14	93.8845	34.2114	14.9891	1590.07	455.047	180.178	101.592	51.9799	7.7468	2.2026	1264.35	412.22	153.571	99.9227	42.0727	7.4262	1.3476	1121.76	478.421	229.987
LD21	10	2	1	84	37	63	16	37	5	75	50	5	16	63	116	117	134	367	2253.99	879.185	150.579	61.377	58.0307	14.192	4.915	3051.91	1079.47	158.87	73.7335	69.6291	20.6356	12.5434	1331.73	520.233	123.403	59.3852	44.8485	12.0129	2.8904	2233.95	871.263	128.326	68.6892	62.6971	20.2087	12.7846	1220.28	736.589	111.23
LD22	10	2	1	88	50	16	75	5	91	50	50	5	16	91	141	146	162	449	1194.85	803.024	385.514	377.83	67.3971	14.1497	4.0961	1313.58	866.725	429.862	367.578	67.4408	15.9409	5.2708	885.772	729.116	356.279	404.71	57.7627	14.0917	2.2512	800.281	817.842	384.654	399.466	50.8028	13.7555	2.4651	610.49	794.904	221.565
LD23	9	2	1	87	85	84	16	90	84	63	63	5	16	26	185	237	110	532	1208.89	409.284	388.301	138.787	91.2537	14.8016	3.2714	1021.56	425.376	392.063	139.58	83.4762	11.9588	3.0133	1060.06	509.859	401.146	121.447	83.4637	9.079	2.2672	1012.69	464.545	400.349	143.179	87.7496	11.111	1.896	1119.11	1026.97	1331.45
LD24	10	2	1	96	75	16	16	63	50	63	16	0.4	5	63	107	176	84.4	367.4	1909.95	1499.88	865.107	115.658	54.7537	9.6689	2.1491	1789.16	1509.36	902.307	117.558	50.9572	9.547	2.5188	1655.35	1602.78	689.085	97.5293	64.4276	13.1662	5.6159	1190.42	1416.64	731.726	95.1558	56.054	9.9689	2.2931	830.962	908.976	537.556
LD25	9	1	1	79	0.1	0.4	0.4	0.1	63	50	63	16	0.1	26	0.9	113.1	105.1	219.1	2498	988.917	373.776	104.148	66.0537	18.4188	7.3424	2987.17	1014.61	430.411	124.24	75.7648	18.429	8.19	1211.04	783.552	305.778	133.49	60.8546	11.4682	4.2701	1594.23	817.766	323.102	127.341	65.4452	11.4494	3.6054	1445.1	767.097	480.431
LD26	10	1	1	75	50	0.4	63	26	2	75	16	0.4	2	16	113.4	103	34.4	250.8	5214.2	717.844	249.871	194.22	94.6276	36.5061	14.8535	1460.84	598.963	244.292	144.534	64.5819	25.2849	4.7189	883.251	544.943	214.425	147.022	69.509	16.5984	1.9079	890.917	581.655	218.959	130.438	65.9757	17.3953	1.7232	1013.42	756.24	216.516
LD27	10	1	1	88	0.1	0.1	0.1	1	9	26	5	16	0.4	26	0.3	36	47.4	83.7	1327	1183.2	209.205	62.4433	108.25	10.3024	3.346	1781.23	1202.05	227.455	68.624	128.725	15.3175	4.74	908.817	716.774	148.297	59.5858	87.4955	10.1582	2.1527	1666.01	1141.92	193.275	75.7186	129.268	18.3603	3.5548	1025.42	516.224	119.657
LD28	10	2	1	83	9	37	16	16	84	37	37	50	84	63	62	137	234	433	1580.24	613.849	569.393	331.517	82.2281	11.6169	2.8835	1593.69	565.712	511.872	335.107	85.1897	10.9421	2.5737	1051.7	606.542	593.793	382.315	75.0128	12.2337	1.9396	1164.75	639.568	587.402	367.608	84.13	9.7669	1.5695	857.969	585.519	709.929
LD29	10	1	1	105	63	37	16	26	63	5	63	16	16	91	116	94	186	396	1866.15	406.062	247.395	75.9094	62.44	13.6381	6.126	2925.39	397.246	272.5	94.3397	68.0978	18.5715	9.9679	1287.13	401.304	221.675	67.9667	51.5408	10.5804	4.2878	1466.83	608.187	299.397	94.2921	57.5163	13.2346	4.9613	887.642	342.194	158.905
LD30	10	2	1	86	9	16	26	50	84	50	2	0.4	0.4	63	51	184	65.8	300.8	1753.1	602.193	299.206	136.352	50.4791	10.3508	3.6369	2044.95	665.664	324.496	159.862	53.6908	14.2338	3.5002	1389.62	783.326	300.603	131.204	63.3254	15.8835	4.0751	1703.28	790.303	352.887	147.43	66.0725	15.7726	2.5109	1243.73	663.702	571.429
LD31	9	1	1	99	1	16	16	16	84	9	63	37	75	63	33	109	238	380	1948.24	936.39	1080.1	121.614	46.1602	8.4427	3.9601	1859.44	988.715	1063.77	128.768	51.2708	7.8517	2.3289	1088.53	660.888	976.506	170.327	45.4373	6.6003	2.3453	1036.34	612.803	922.367	209.84	53.0197	6.7448	2.1721	1094.74	892.308	958.698
LD32	10	2	1	71	0.1	37	5	16	84	16	16	16	0.4	26	42.1	116	58.4	216.5	1620.64	420.267	428.678	444.432	62.8142	14.0193	4.5851	1924.61	471.501	443.329	467.206	60.9786	13.0159	6.2839	766.03	298.905	404.881	474.743	57.7547	11.2214	3.1247	713.168	370.613	444.561	514.198	55.2209	9.5331	2.5806	496.82	344.496	392.584
LD33	9	1	1	85	37	75	9	0.4	0.4	16	9	50	5	63	121	16.8	127	264.8	1590.64	882.105	346.689	182.827	60.0969	14.101	3.5828	2424.07	958.988	388.019	208.425	75.3451	20.9187	9.3495	1338.05	684.062	317.313	231.418	66.9	15.3441	3.18	1316.26	903.855	333.223	349.127	76.5386	19.4734	3.1745	718.724	646.923	300.118
LD34	11	1	1	82	37	63	16	0.1	84	16	37	26	2	16	116	100.1	81	297.1	980.259	355.4	336.068	369.584	77.1048	7.7612	1.6073	916.971	323.842	328.755	353.836	76.1853	8.0446	1.5586	1057.5	383.135	390.314	417.709	87.7496	8.6533	2.1966	1078.1	354.054	357.746	360.248	88.8944	10.8773	2.9024	1086.64	508.116	733.656
LD35	8	1	1	92	75	16	5	0	0	5	84	63	75	91	96	5	313	414	1651.09	1108.4	325.998	105.717	58.8451	13.3248	8.2767	1497.74	852.72	305.924	96.3403	56.1025	14.1994	9.1275	1216.8	1324.99	289.792	119.658	61.9205	7.728	2.1496	1457.93	1063.95	321.352	109.168	61.2686	10.1904	4.2578	976.923	858.198	276.634
LD36	9	1	1	72	0.1	50	5	2	16	50	5	2	16	26	55.1	68	49	172.1	2214.9	867.145	516.723	51.9209	41.9923	7.8436	3.5069	2138.97	961.476	524.707	54.3887	48.0733	9.7235	5.579	981.054	743.294	356.055	53.0908	46.5144	5.1949	1.4216	1204.32	726.058	383.073	62.441	49.3678	7.5842	3.4546	962.842	768.44	1872.16
LD37	9	2	1	91	0.1	26	1	5	50	37	16	50	16	50	27.1	92	132	251.1	1566.52	897.054	708.81	91.5261	53.9246	9.2163	5.0037	1597.37	969.419	701.183	96.3259	57.6094	9.9284	4.2343	966.765	715.68	768.637	78.1007	51.8769	6.736	2.4744	869.149	729.845	734.81	89.2419	52.5082	6.7525	2.6954	913.896	726.385	1278.03
LD38	9	2	1	88	63	91	37	75	84	9	0.1	5	0.1	75	191	168	80.2	439.2	1880.48	487.08	268.366	240.134	63.9381	15.4075	7.2971	1563.84	478.778	239.238	249.81	66.0553	17.9015	9.0371	1116.15	515.559	241.484	262.992	60.3365	12.1426	1.7548	979.6	433.378	250.543	248.041	53.4002	13.0223	2.7505	682.32	403.135	181.455
LD39	8	1	1	92	84	84	9	84	5	37	84	37	2	26	177	126	149	452	1202.18	526.212	381.906	125.07	71.6448	15.1839	3.0236	1078.3	514.86	372.431	121.393	82.3219	25.3274	3.4083	1051.04	579.057	360.744	194.717	93.9282	17.1875	1.8152	820.463	536.518	374.006	195.118	95.2969	23.6777	2.1515	578.912	469.969	528.776
LD40	10	1	1	82	37	9	37	37	63	26	16	63	50	2	83	126	131	340	2003.6	751.663	1018.99	207.305	52.3741	11.6041	4.8863	2478.19	726.152	999.283	222.499	50.5134	10.1601	4.7128	1155.46	609.904	964.113	200.172	43.0195	9.0406	2.7412	992.035	613.979	933.717	207.825	39.148	7.4278	2.5603	790.342	434.826	547.914
LD41	11	1	1	99	0.4	50	0.4	1	98	2	37	63	37	91	50.8	101	228	379.8	3724.95	2944.26	567.666	105.336	35.9624	7.1914	3.2786	2978.81	2946.84	619.428	108.99	38.7455	7.5567	3.2785	2634.99	1947.71	555.297	103.443	38.8674	7.4757	3.032	2358.35	1811.18	593.645	104.19	45.3496	9.7566	5.7185	1335.1	1029.34	669.904
LD42	10	1	1	98	50	16	50	63	84	9	63	75	75	91	116	156	304	576	980.446	1492.2	521.803	160.859	58.0137	7.2397	2.7263	1239.59	1473.74	496.42	152.872	67.2117	7.2608	2.4054	869.409	1025.36	605.646	186.874	100.802	8.4018	3.1361	960.686	879.853	532.324	149.983	110.205	8.5042	2.3867	659.632	1444.86	488.872
LD43	11	1	1	87	0.1	5	16	1	37	2	63	0.1	0.1	2	21.1	40	65.2	126.3	1910.98	1521.82	487.512	175.204	73.1018	10.329	2.9825	2155.18	1539.38	514.407	163.676	75.0699	11.2919	4.0942	1081.47	2007.84	520.873	218.052	140.578	12.4871	2.906	1122.2	1737.58	513.403	164.607	141.736	9.9947	2.479	770.253	988.22	437.227
LD44	10	2	1	105	16	26	75	16	9	99	75	1	2	26	117	124	104	345	498.828	354.507	390.154	175.826	76.0104	21.154	7.3955	284.261	245.478	344.417	119.186	43.0263	11.6418	3.0437	260.974	225.56	331.826	111.604	42.4481	11.1748	2.5594	268.445	231.317	335.911	113.63	41.7186	10.978	2.6269	192.502	225.366	292.195
LD45	10	2	1	86	16	2	37	84	75	50	9	37	9	63	55	209	118	382	1318.81	227.406	200.4	103.106	39.4468	16.5628	6.935	1294.17	240.932	216.746	108.455	44.496	17.1333	6.4561	448.421	180.063	192.789	77.7781	50.1701	17.691	4.182	649.23	190.101	219.705	93.8484	44.3599	18.048	4.1915	308.283	236.406	260.166
LD46	9	1	1	83	1	9	26	5	91	9	63	5	50	16	36	105	134	275	562.881	488.58	213.46	48.6909	47.4554	22.6825	6.9115	1036.01	540.595	220.64	54.4205	49.0506	26.9668	8.4527	535.995	463.212	179.588	49.3453	48.6753	20.5852	4.0685	567.45	470.93	187.307	57.8296	58.2652	25.5733	4.3861	405.812	461.402	170.687
LD47	9	2	1	73	63	37	84	84	84	16	50	5	1	16	184	184	72	440	517.973	425.58	313.408	54.7319	48.077	37.0353	10.4414	528.198	384.59	275.663	49.7532	45.4576	37.8587	11.1317	494.619	433.96	306.954	52.0586	78.4664	35.1129	5.0195	409.067	303.498	225.741	47.4875	55.1047	27.6476	4.6432	296.214	468.807	205.654
LD48	11	2	1	95	5	75	75	63	75	37	5	50	95	91	155	175	241	571	567.388	352.584	222.091	51.5686	50.7165	30.5547	9.4242	582.024	348.571	225.077	45.5939	53.7985	29.5229	6.4285	392.133	329.857	255.562	43.5675	73.6424	32.0578	4.8631	319.397	289.623	257.314	39.0218	64.7262	40.8036	4.8291	255.754	256.796	209.031
LD49	10	1	1	92	16	5	63	91	9	37	50	63	75	75	84	137	263	484	267.641	314.364	196.59	25.8712	78.3731	45.7979	12.4254	377.885	319.066	207.291	28.3129	119.576	100.192	10.8969	238.069	275.295	256.242	32.8335	172.035	77.3513	2.908	272.999	217.18	214.552	32.9198	196.207	157.035	3.8907	136.14	206.124	218.241
LD50	9	1	1	93	16	2	26	16	84	37	84	63	75	91	44	137	313	494	435.463	313.67	42.0826	90.2085	48.3674	34.4709	8.5746	465.005	337.839	38.5401	89.9707	52.5778	37.3365	9.8256	277.267	219.53	35.9876	83.4973	51.1072	39.6483	4.8407	266.679	239.58	36.4036	92.8697	42.4183	30.5051	4.0338	190.45	200.913	30.5955
LD51	9	1	1	88	5	9	63	16	84	26	84	0.4	1	50	77	126	135.4	338.4	502	240.302	79.9133	53.9844	64.2193	29.6105	9.224	525.803	262.141	77.4689	61.4027	58.9276	34.6004	10.914	341.343	227.303	101.562	60.1108	87.8039	29.0611	6.2661	388.684	246.546	80.9308	70.9968	72.7093	32.29	7.2693	325.201	238.645	87.2771
LD52	9	2	1	87	9	5	1	16	2	16	16	1	9	26	15	34	52	101	529.585	349.09	328.099	63.1892	107.009	22.3124	7.2884	557.709	342.735	325.651	73.2331	116.454	28.7668	9.2967	459.661	278.45	376.661	48.7392	131.345	27.3887	4.3528	430.284	298.389	336.267	53.6986	160.934	22.7206	3.8271	293.317	205.153	474.282
LD53	8	1	1	71	0.1	0.4	16	0.1	1	1	37	5	5	50	16.5	2.1	97	115.6	1444.25	472.214	165.922	241.256	99.3874	83.8975	13.9402	1404.84	472.208	170.431	240.269	69.2382	34.3193	6.596	978.989	490.155	209.949	245.503	75.6727	39.3736	3.2019	1018.79	549.371	219.271	243.325	78.6404	41.8147	3.7272	725.403	421.719	156.64
LD54	8	2	1	90	0.1	0.4	1	0.1	75	26	63	50	50	50	1.5	101.1	213	315.6	1193.57	716.241	406.195	244.748	102.198	44.5903	9.8744	1162.86	795.246	444.75	237.349	91.5876	37.3962	8.7507	489.257	405.246	313.47	208.534	77.7644	24.9969	5.1836	564.894	474.929	405.629	233.288	88.4854	36.8837	7.1548	341.215	423.009	272.081
LD55	9	1	1	99	1	16	5	37	75	5	63	37	2	2	22	117	104	243	1703.63	401.163	664.965	77.2355	38.5599	9.0333	3.8509	2679.56	474.423	607.407	77.5687	48.7321	13.2917	6.5078	1272.94	422.53	694.675	63.7778	41.5515	9.5624	2.4919	1510.72	478.721	540.309	75.981	59.7965	12.2465	3.6083	1094.27	491.098	566.09
LD56	10	2	1	82	9	95	91	63	84	37	50	50	37	75	195	184	212	591	1967.44	1540.17	270.255	88.3674	51.0529	8.3023	3.8767	1974.26	1162.59	273.684	87.9881	59.9557	10.0412	3.4331	1410.15	1070.76	283.944	109.787	61.6036	8.5023	3.1681	1224.75	819.108	273.109	107.136	59.5638	7.8939	2.7998	972.943	488.861	253.447
LD57	8	2	1	108	0.1	0.4	16	0.4	2	5	9	16	9	63	16.5	7.4	97	120.9	1155.28	650.676	539.143	81.7285	58.9479	24.0887	6.0114	1098.99	678.283	512.164	84.8578	61.2716	24.3465	4.7544	562.936	628.629	435.252	86.5616	57.8639	21.8612	2.8386	532.188	749.477	402.974	67.9012	62.4421	23.3517	3.1532	516.933	487.617	291.426
LD58	9	1	1	100	26	84	63	16	0.4	37	16	9	0.4	75	173	53.4	100.4	326.8	976.202	759.798	194.655	101.801	90.9876	45.5395	12.7581	1381.28	835.139	208.918	107.344	91.2074	47.3509	9.2829	722.255	642.828	160.616	96.6066	98.823	31.9463	3.3172	818.958	548.815	168.856	99.4276	111.403	55.3137	3.5836	608.373	584.938	105.686
LD59	9	1	1	98	9	50	5	16	63	50	84	63	5	26	64	129	178	371	1258.38	861.044	528.466	58.8032	51.8925	27.8373	6.0971	1364.4	941.259	518.076	59.1086	56.0325	24.1091	5.5922	698.291	522.177	479.824	59.4526	49.135	25.0245	4.0333	845.671	742.187	462.216	60.4332	63.4859	24.4625	4.3525	508.124	342.502	463.499
LD60	10	2	1	101	1	16	1	16	63	16	84	5	9	50	18	95	148	261	997.554	392.361	124.878	206.648	60.0826	36.3238	8.0193	1178.27	398.383	132.266	200.224	64.09	38.3568	8.5952	407.545	206.399	109.057	224.74	57.395	33.4428	3.2466	382.344	201.707	118.959	209.985	59.3703	28.8278	3.6692	225.876	222.252	80.5992
LD61	9	1	1	120	0.1	84	16	50	16	75	84	63	50	50	100.1	141	247	488.1	1530.77	1014.32	520.915	71.7093	61.9006	15.5891	4.8449	1537.85	1058.5	538.111	76.8859	54.9321	12.3237	4.9616	1514.63	1200.77	582.409	75.9359	51.8637	10.4096	2.7829	1141.54	1056.2	568.196	72.1865	43.61	8.3164	2.6277	865.52	1015.39	548.355
LD62	8	1	1	99	0.1	9	9	0.1	16	1	16	16	26	75	18.1	17.1	133	168.2	1574.54	459.599	397.036	70.2003	43.941	14.6271	4.7988	1281.11	505.886	415.735	64.7751	36.0104	11.3454	3.3088	1485.99	717.462	448.431	95.4045	46.5142	13.9997	3.0069	1313.96	578.211	505.174	76.2119	43.4067	17.76	2.962	1142.41	671.915	609.402
LD63	9	2	1	102	5	37	16	26	84	37	50	5	37	0.4	58	147	92.4	297.4	2162.95	859.333	194.469	118.423	62.7833	13.3576	4.9927	1821.88	794.398	198.542	108.199	64.3569	14.5185	5.6979	2081.93	1117.3	240.176	162.075	84.0906	13.8315	3.1192	2040.65	883.651	246.665	141.859	68.4905	14.2693	3.4475	1315.1	1216.24	272.672
LD64	11	2	1	97	1	9	16	50	84	95	16	5	16	26	26	229	63	318	1749.59	567.782	305.991	72.2376	120.496	28.7619	4.3797	1630.48	543.152	269.899	72.7374	153.242	37.1943	4.7184	926.094	433.288	300.39	71.0366	113.294	22.2778	2.0522	863.824	392.596	217.245	71.2261	132.25	20.6741	2.1748	623.642	391.543	312.652
LD65	8	1	1	82	37	50	9	50	75	37	63	16	2	2	96	162	83	341	1267.13	451.896	815.619	109.091	61.9523	22.452	4.2652	1114.82	478.674	797.72	106.446	58.621	19.0988	2.5899	1312.52	433.365	808.997	108.386	47.3599	9.8876	4.1445	1190.61	648.792	758.036	126.707	82.0627	15.3747	2.8825	711.393	469.723	545.623
LD66	9	2	1	85	2	63	26	16	16	75	84	0.1	37	26	91	107	147.1	345.1	2502.71	902.336	265.787	30.1472	31.0166	7.3767	3.0926	2547.94	908.961	267.637	30.1816	31.2517	7.5158	3.1138	2405.37	766.341	249.964	32.3998	30.5825	7.7579	3.0882	1657.03	892.391	275.887	36.9801	35.1883	8.4184	1.8565	1887.4	866.741	338.51
LD67	8	1	1	101	26	16	2	16	84	37	37	16	16	63	44	137	132	313	2049.08	510.902	252.95	69.4246	62.3168	13.1138	3.9521	2094.21	530.606	239.039	73.638	99.9001	38.5342	6.2655	1542.43	710.069	252.181	65.3684	62.2928	8.5147	3.6913	1546.7	569.664	268.244	69.175	54.9987	9.7413	2.4404	1157.73	602.119	325.906
LD68	10	1	1	73	0	0	0	0	0	0.1	63	0.1	0.1	26	0	0.1	89.2	89.3	1664.8	619.29	479.075	69.7558	46.2964	13.711	8.5032	969.352	587.11	474.792	62.6517	39.1252	8.3991	2.9431	1445.26	663.076	442.4	70.173	51.3712	14.6255	2.9341	923.726	569.516	500.754	62.1543	49.1984	8.6126	2.0856	1172.44	748.914	438.144
LD69	9	2	1	89	26	63	5	9	75	9	16	9	9	75	94	93	109	296	2252.35	884.723	410.237	71.0864	62.9005	18.8919	8.6845	1329.54	712.023	334.244	54.9777	44.8783	12.6197	6.3166	968.239	687.449	347.787	52.9009	52.0266	11.3243	3.3167	932.042	607.874	317.759	50.8191	44.7556	10.0905	2.7464	765.966	827.147	669.035
LD70	9	1	1	89	75	91	16	37	84	37	50	5	26	63	182	158	144	484	2926.72	542.49	346.088	60.8172	46.8025	15.5017	9.8206	1537.65	489.426	339.47	54.7741	39.7313	9.6886	3.9206	1708.41	608.917	352.24	72.8869	57.1764	13.6625	6.7918	1038.64	443.099	356.099	51.5643	41.3347	9.0485	2.7178	687.217	527.225	301.457
LD71	9	1	1	96	16	50	9	26	84	37	16	0.4	26	26	75	147	68.4	290.4	995.491	458.91	107.297	45.9695	89.9769	68.8922	18.2783	1060.15	487.387	114.715	48.7816	76.0126	50.3131	6.4874	690.549	539.891	103.617	39.8221	89.9736	51.7918	3.3789	791.91	756.017	108.452	44.3195	96.4305	54.1672	3.6335	563.337	506.796	80.9828
LD72	8	1	1	98	16	75	9	5	37	37	16	16	63	26	100	79	121	300	4172.44	900.313	209.472	120.244	66.671	13.8233	4.9247	4188.59	893.507	207.768	120.218	69.6601	13.9165	4.9508	4660.3	970.923	191.007	133.223	68.2361	16.1323	8.7145	2093.1	789.863	119.534	108.093	97.8305	13.6366	4.4316	2088.37	785.398	121.52
LD73	9	1	1	81	9	16	75	50	37	84	16	5	16	26	100	171	63	334	1686.88	646.592	353.413	55.6548	56.3862	26.7377	6.961	1906.14	599.946	364.669	59.5983	63.7357	30.5823	8.248	779.901	566.013	276.615	37.2656	49.1546	18.4007	3.8597	589.38	569.776	283.724	44.0611	48.4728	18.2453	4.2803	382.614	487.613	217.618
LD74	9	1	1	81	19	0.1	0.1	0.1	0.1	0.1	0.1	1	1	16	19.2	0.3	18.1	37.6	896.038	299.35	186.575	118.139	58.6345	19.0561	4.2467	1613.41	300.967	212.097	140.796	61.7674	21.9499	4.8634	1008.34	379.336	236.564	144.237	65.4077	18.0401	2.9992	852.159	347.824	220.992	167.806	75.4675	22.0764	3.2766	565.856	280.774	230.598
LD75	8	1	1	98	16	16	9	5	37	37	37	9	63	63	41	79	172	292	735.667	329.441	398.277	69.2087	70.9079	23.5372	5.1821	690.221	344.607	378.528	75.7344	72.0768	22.7884	4.3434	517.621	271.558	321.132	75.0595	76.3055	22.3387	3.8597	487.915	305.907	311.188	85.8902	76.4653	26.8096	4.7075	335.52	248.823	275.269
LD76	8	2	1	95	0.1	0.1	0.1	0.1	2	0.1	63	2	0.4	50	0.3	2.2	115.4	117.9	975.082	562.01	157.321	44.904	81.331	36.8446	11.6618	927.626	526.096	163.646	48.5211	84.011	43.7225	15.5788	739.071	461.389	205.157	57.6596	124.188	29.5487	3.941	852.966	406.622	231.734	58.5291	105.677	26.2357	2.992	413.237	381.722	378.489
LD77	8	1	1	78	0.1	0.1	0.1	0.1	0.1	0.1	16	0.4	5	26	0.3	0.3	47.4	48	835.022	387.814	478.016	48.9045	54.1408	19.333	4.8918	735.793	395.322	469.094	45.5762	63.0618	22.1155	4.4549	686.455	377.993	501.09	61.1481	61.4325	19.6345	3.2233	623.134	401.759	475.115	77.8717	67.53	24.1943	3.9407	493.038	396.628	1073.78
LD78	8	2	1	105	37	26	9	16	37	50	63	63	50	50	72	103	226	401	896.527	407.681	152.802	62.9115	74.1464	58.8006	13.6039	776.663	377.68	159.446	59.9566	66.9643	52.0161	12.1974	629.8	442.1	146.334	69.7297	59.0016	34.0593	4.7274	571.722	331.657	153.087	119.79	71.0544	46.0557	7.0695	435.112	360.684	167.618
LD79	9	1	1	92	2	16	37	1	63	75	0.1	16	16	26	55	139	58.1	252.1	1277.31	441.214	298.126	101.206	97.1913	35.5435	8.6862	1272.77	435.751	293.647	126.666	79.508	28.9262	6.0376	728.443	446.749	253.046	87.7791	72.8325	17.8164	2.7307	695.022	445.952	278.433	152.738	87.3394	30.8911	2.6797	576.898	803.261	539.108
LD80	8	1	1	81	0.1	0.1	0.1	2	5	0.4	9	2	0.1	2	0.3	7.4	13.1	20.8	2083.7	673.548	184.668	159.19	58.1538	23.7752	6.4725	2000.09	573.882	219.539	166.45	72.8563	28.2783	8.0783	1367.44	669.251	174.564	144.025	56.3412	24.2348	4.7411	1416.69	699.15	188.748	149.751	67.4957	24.7958	4.4061	835.02	363.877	147.498
LD81	9	1	1	84	0.1	5	0.1	50	0.4	2	16	26	63	50	5.2	52.4	155	212.6	495.477	201.21	331.258	177.03	43.0371	23.5344	5.2131	644.719	214.578	323.983	181.993	58.1848	35.0683	9.7717	335.343	186.949	305.262	154.258	67.0405	41.8577	6.7574	407.598	201.933	284.411	145.721	58.0702	36.985	4.3374	280.026	166.824	315.829
LD82	9	1	1	103	1	84	9	26	95	37	16	16	16	50	94	158	98	350	1875.37	899.171	124.599	55.06	65.9412	25.5264	7.6646	1444.17	933.896	126.724	50.8385	57.8455	23.1235	5.3828	765.634	599.306	99.9331	38.0417	56.9809	18.476	2.7535	583.656	633.415	106.003	41.7707	57.4136	19.4102	2.2968	579.124	380.794	135.879
LD83	11	1	1	84	0.1	9	9	2	5	0.1	63	63	63	91	18.1	7.1	280	305.2	731.471	225.552	159.29	318.633	74.5462	49.7918	6.355	997.545	256.032	168.833	323.914	89.7747	82.5964	8.8317	545.158	253.418	171.464	382.087	76.7822	40.4797	1.7714	741.725	271.895	186.949	375.752	86.2606	65.4453	2.5663	473.415	236.271	151.487
LD84	11	1	1	88	26	75	2	0.4	2	9	37	16	50	63	103	11.4	166	280.4	682.119	310.925	180.949	187.889	52.4856	27.9021	6.0032	614.007	322.272	179.239	181.141	54.7587	38.2097	10.0755	542.17	283.491	188.754	205.768	97.3749	30.3059	2.967	689.385	329.199	186.267	219.5	102.475	39.1201	2.8063	430.238	246.058	223.422
LD85	9	1	1	88	26	9	5	0.4	0.4	0.4	84	16	50	63	40	1.2	213	254.2	606.139	228.501	147.498	150.861	110.673	75.6127	7.2047	592.141	205.856	147.1	147.945	107.12	84.2403	7.0498	445.243	183.168	143.228	141.755	156.298	76.0486	3.4327	613.408	217.7	126.362	122.716	143.023	100.772	3.0912	371.796	189.538	106.114
LD86	8	2	1	81	0.4	26	9	9	84	16	63	2	5	50	35.4	109	120	264.4	2043.22	581.862	258.553	138.842	73.7856	33.7162	8.8424	1988.63	503.246	257.84	142.429	86.8804	36.1655	8.4061	504.09	313.89	269.222	121.701	64.0962	21.9576	2.1447	588.45	396.826	260.62	126.145	68.8554	25.0178	2.9223	456.218	460.505	332.19
LD87	8	1	1	99	16	9	16	63	37	26	37	2	16	16	41	126	71	238	1264.98	415.691	400.893	75.5596	95.5105	109.979	12.2606	1252.79	459.584	406.921	68.0855	107.159	127.03	23.4757	567.981	355.237	399.083	80.0272	76.5975	55.4873	2.7474	745.597	361.601	427.629	67.8923	84.4305	64.625	2.4802	462.458	335.219	402.035
LD88	11	1	1	79	2	5	2	0.1	37	5	63	0.4	16	26	9	42.1	105.4	156.5	947.975	249.442	79.3222	83.018	71.4729	23.4541	6.1477	1487.31	258.319	94.094	84.0447	87.9221	27.2999	6.9482	688.721	315.296	105.76	81.9649	91.8122	22.1329	3.1439	863.929	298.927	102.164	90.5348	105.389	28.4301	4.5333	538.885	308.541	92.1257
LD89	8	1	1	105	9	16	2	16	63	16	37	50	26	16	27	95	129	251	985.32	1938.97	187.504	66.784	55.7988	21.3271	6.5077	931.07	1293.03	181.884	75.8187	65.0276	30.2362	9.8857	646.376	1473.7	219.042	60.8992	55.0218	16.0121	2.3426	742.343	1013.74	202.161	73.7151	53.0497	16.0965	3.9871	423.61	431.512	185.324
LD90	10	1	1	89	5	16	16	0.1	75	5	63	2	9	2	37	80.1	76	193.1	841.172	355.145	147.713	57.7599	72.7566	45.7402	12.7572	986.663	391.267	157.198	62.9078	109.034	112.681	33.8313	744.803	367.66	115.175	49.7711	65.1623	19.771	3.8847	724.244	389.059	133.395	40.2756	78.7103	22.3624	3.6819	470.511	297.872	109.129
LD91	8	2	1	85	0.1	2	0.1	0.1	16	16	37	0.4	37	63	2.2	32.1	137.4	171.7	1810.98	1264.26	300.773	52.6606	70.1297	30.6187	9.2336	1072.19	771.091	254.639	37.5781	47.7916	16.1664	4.4437	572.649	512.005	312.032	36.4271	56.2901	17.5574	2.8625	1127.06	569.258	271.97	48.8718	60.8107	22.3711	2.8228	732.422	445.862	629.793
[truncated: 102 more columns]
